# Supplementary material for: The Role of the Mediterranean Diet in Breast Cancer Survivorship: A Systematic Review and Meta-Analysis of Observational Studies and Randomised Controlled Trials
Source: MDPI journal article supplement (doi:10.3390/nu15092099), 2023-04-27
Supplement: s1 [file s1]

| <b>Supplementary number and description</b>                                                                     | <b>Page</b> |
|-----------------------------------------------------------------------------------------------------------------|-------------|
| <b>Supplementary Table S1:</b> PRISMA checklist                                                                 | 2-3         |
| <b>Supplementary Table S2:</b> Search strategy in detail                                                        | 4           |
| <b>Supplementary Table S3:</b> Newcastle–Ottawa scale<br>(cohort study and adapted for cross-sectional studies) | 5-6         |
| <b>Supplementary Table S4:</b> List of excluded papers (at full-text screening stage)                           | 8-10        |
| <b>Supplementary Table S5:</b> Characteristics of included studies                                              | 11-14       |
| <b>Supplementary Table S6:</b> GRADE assessment                                                                 | 15-16       |
| <b>Supplementary Table S7:</b> The QoL result of Porciello et al., 2020 [42]                                    | 17-19       |
| <b>Supplementary Figure S1:</b> Meta-analysis all-cause mortality (medium adjusted)                             | 20          |
| <b>Supplementary Figure S2:</b> Meta-analysis BMI (Random-effects model)                                        | 21          |

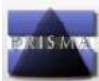

**Supplementary Table S1.PRISMA checklist**

| Section/topic                      | #  | Checklist item                                                                                                                                                                                                                                                                                              | Reported on page #                 |
|------------------------------------|----|-------------------------------------------------------------------------------------------------------------------------------------------------------------------------------------------------------------------------------------------------------------------------------------------------------------|------------------------------------|
| <b>TITLE</b>                       |    |                                                                                                                                                                                                                                                                                                             |                                    |
| Title                              | 1  | Identify the report as a systematic review, meta-analysis, or both.                                                                                                                                                                                                                                         | Title page                         |
| <b>ABSTRACT</b>                    |    |                                                                                                                                                                                                                                                                                                             |                                    |
| Structured summary                 | 2  | Provide a structured summary including, as applicable: background; objectives; data sources; study eligibility criteria, participants, and interventions; study appraisal and synthesis methods; results; limitations; conclusions and implications of key findings; systematic review registration number. | Abstract and p1                    |
| <b>INTRODUCTION</b>                |    |                                                                                                                                                                                                                                                                                                             |                                    |
| Rationale                          | 3  | Describe the rationale for the review in the context of what is already known.                                                                                                                                                                                                                              | p2                                 |
| Objectives                         | 4  | Provide an explicit statement of questions being addressed with reference to participants, interventions, comparisons, outcomes, and study design (PICOS).                                                                                                                                                  | p2                                 |
| <b>METHODS</b>                     |    |                                                                                                                                                                                                                                                                                                             |                                    |
| Protocol and registration          | 5  | Indicate if a review protocol exists, if and where it can be accessed (e.g., Web address), and, if available, provide registration information including registration number.                                                                                                                               | Abstract and p 2                   |
| Eligibility criteria               | 6  | Specify study characteristics (e.g., PICOS, length of follow-up) and report characteristics (e.g., years considered, language, publication status) used as criteria for eligibility, giving rationale.                                                                                                      | p3-5                               |
| Information sources                | 7  | Describe all information sources (e.g., databases with dates of coverage, contact with study authors to identify additional studies) in the search and date last searched.                                                                                                                                  | p4 and Supplement: Search Strategy |
| Search                             | 8  | Present full electronic search strategy for at least one database, including any limits used, such that it could be repeated.                                                                                                                                                                               | p4 Supplement: Search Strategy     |
| Study selection                    | 9  | State the process for selecting studies (i.e., screening, eligibility, included in systematic review, and, if applicable, included in the meta-analysis).                                                                                                                                                   | p4-5                               |
| Data collection process            | 10 | Describe method of data extraction from reports (e.g., piloted forms, independently, in duplicate) and any processes for obtaining and confirming data from investigators.                                                                                                                                  | p4-5                               |
| Data items                         | 11 | List and define all variables for which data were sought (e.g., PICOS, funding sources) and any assumptions and simplifications made.                                                                                                                                                                       | p3-5                               |
| Risk of bias in individual studies | 12 | Describe methods used for assessing risk of bias of individual studies (including specification of whether this was done at the study or outcome level), and how this information is to be used in any data synthesis.                                                                                      | p5                                 |
| Summary measures                   | 13 | State the principal summary measures (e.g., risk ratio, difference in means).                                                                                                                                                                                                                               | p5-6                               |
| Synthesis of results               | 14 | Describe the methods of handling data and combining results of studies, if done, including measures of consistency (e.g., $I^2$ ) for each meta-analysis.                                                                                                                                                   | p5-6                               |

| Section/topic                 | #  | Checklist item                                                                                                                                                                                           | Reported on page #                                                                          |
|-------------------------------|----|----------------------------------------------------------------------------------------------------------------------------------------------------------------------------------------------------------|---------------------------------------------------------------------------------------------|
| Risk of bias across studies   | 15 | Specify any assessment of risk of bias that may affect the cumulative evidence (e.g., publication bias, selective reporting within studies).                                                             | p5-6 and Supplement: Adapted Newcastle-Ottawa scale                                         |
| Additional analyses           | 16 | Describe methods of additional analyses (e.g., sensitivity or subgroup analyses, meta-regression), if done, indicating which were pre-specified.                                                         | p5-6                                                                                        |
| <b>RESULTS</b>                |    |                                                                                                                                                                                                          |                                                                                             |
| Study selection               | 17 | Give numbers of studies screened, assessed for eligibility, and included in the review, with reasons for exclusions at each stage, ideally with a flow diagram.                                          | p6-7, Figure 1 and Supplement: List of excluded papers (at full-text screening stage)       |
| Study characteristics         | 18 | For each study, present characteristics for which data were extracted (e.g., study size, PICOS, follow-up period) and provide the citations.                                                             | p6-7, and Supplement: TableS5 Characteristics of included studies                           |
| Risk of bias within studies   | 19 | Present data on risk of bias of each study and, if available, any outcome level assessment (see item 12).                                                                                                | p7-9, Table 2 and Supplement: GRADE assessment                                              |
| Results of individual studies | 20 | For all outcomes considered (benefits or harms), present, for each study: (a) simple summary data for each intervention group (b) effect estimates and confidence intervals, ideally with a forest plot. | p8-20, Figure 2, Table 3 and Supplement: Table S7                                           |
| Synthesis of results          | 21 | Present results of each meta-analysis done, including confidence intervals and measures of consistency.                                                                                                  | p8-20, Figure 2, Figure 3, Figure 4 and Supplement: GRADE assessment, Figures S1, Figure S2 |
| Risk of bias across studies   | 22 | Present results of any assessment of risk of bias across studies (see Item 15).                                                                                                                          | p7-8, Table 2 and Supplement: GRADE assessment                                              |
| Additional analysis           | 23 | Give results of additional analyses, if done(e.g., sensitivity or subgroup analyses, meta-regression [see Item 16]).                                                                                     | p20, Figure 3, Figure 4 and Supplement: Figures S1, Figure S2                               |
| <b>DISCUSSION</b>             |    |                                                                                                                                                                                                          |                                                                                             |
| Summary of evidence           | 24 | Summarize the main findings including the strength of evidence for each main outcome; consider their relevance to key groups (e.g., healthcare providers, users, and policy makers).                     | p17-20                                                                                      |
| Limitations                   | 25 | Discuss limitations at study and outcome level (e.g., risk of bias), and at review-level (e.g., incomplete retrieval of identified research, reporting bias).                                            | p19                                                                                         |
| Conclusions                   | 26 | Provide a general interpretation of the results in the context of other evidence, and implications for future research.                                                                                  | p20                                                                                         |
| <b>FUNDING</b>                |    |                                                                                                                                                                                                          |                                                                                             |
| Funding                       | 27 | Describe sources of funding for the systematic review and other support (e.g., supply of data); role of funders for the systematic review.                                                               | p20                                                                                         |

## **Supplementary Table S2. Search strategy**

### **Medline search terms:**

1. exp Breast Neoplasms/
2. ((breast\* or mammary) adj3 (cancer\* or carcinoma\* or neoplasm\* or tumor\* or tumour\*)).mp.  
[mp=title, abstract, original title, name of substance word, subject heading word, floating sub-heading word, keyword heading word, organism supplementary concept word, protocol supplementary concept word, rare disease supplementary concept word, unique identifier, synonyms]
3. 1 or 2
4. Diet, Mediterranean/
5. (mediterranean adj2 (diet\* or lifestyle)).mp. [mp=title, abstract, original title, name of substance word, subject heading word, floating sub-heading word, keyword heading word, organism supplementary concept word, protocol supplementary concept word, rare disease supplementary concept word, unique identifier, synonyms]
6. 4 or 5
7. 3 and 6
8. limit 7 to humans

### **Embase search terms:**

1. exp breast cancer/ or breast tumor/
2. ((breast\* or mammary) adj3 (cancer\* or carcinoma\* or neoplasm\* or tumor\* or tumour\*)).mp.  
[mp=title, abstract, heading word, drug trade name, original title, device manufacturer, drug manufacturer, device trade name, keyword heading word, floating subheading word, candidate term word]
3. 1 or 2
4. exp Mediterranean diet/
5. (Mediterranean adj2 (diet\* or lifestyle)).mp. [mp=title, abstract, heading word, drug trade name, original title, device manufacturer, drug manufacturer, device trade name, keyword heading word, floating subheading word, candidate term word]
6. 4 or 5
7. 3 and 6
8. limit 7 to human

### **Web of science search terms:**

1. TS=(Mediterranean Near/s(diet\* or lifestyle))
2. TS=((breast\* or mammary) NEAR/3(cancer\* or carcinoma\* or neoplasm\* or tumor\* of tumour\*))
3. 1 and 2

### **Cochrane Library search terms:**

1. MeSH descriptor: [Breast Neoplasms] explode all trees
2. MeSH descriptor: [Diet, Mediterranean] explode all trees
3. ((breast\* or mammary) NEAR/3 (cancer\* or carcinoma\* or neoplasm\* or tumor\* or tumour\*)) :ti,ab,kw
4. (mediterranean NEAR/2 (diet\* or lifestyle)) :ti,ab,kw
5. 1 OR 3
6. 2 OR 4
7. 5 AND 6

**Supplementary Table S3: Newcastle–Ottawa scale**  
(cohort study and adapted for cross-sectional studies)

**NEWCASTLE - OTTAWA QUALITY ASSESSMENT SCALE**  
**COHORT STUDIES**

Note: A study can be awarded a maximum of one star for each numbered item within the Selection and Outcome categories. A maximum of two stars can be given for Comparability

**Selection (maximum 4 points):**

1) Representativeness of the exposed cohort

- a) truly representative of the average \_\_\_\_\_ (describe) in the community ✱
- b) somewhat representative of the average \_\_\_\_\_ in the community ✱
- c) selected group of users eg nurses, volunteers
- d) no description of the derivation of the cohort

2) Selection of the non exposed cohort

- a) drawn from the same community as the exposed cohort ✱
- b) drawn from a different source
- c) no description of the derivation of the non exposed cohort

3) Ascertainment of exposure

- a) secure record (eg surgical records) ✱
- b) structured interview ✱
- c) written self report
- d) no description

4) Demonstration that outcome of interest was not present at start of study

- a) yes ✱
- b) no

**Comparability (maximum 2 points):**

1) Comparability of cohorts on the basis of the design or analysis

- a) study controls for \_\_\_\_\_ (age and ER/cancer subtype/cancer stage) ✱
- b) study controls for any additional factor ✱ (This criteria could be modified to indicate specific control for a second important factor.)

**Outcome (maximum 3 points)**

1) Assessment of outcome

- a) independent blind assessment ✱
- b) record linkage ✱
- c) self report
- d) no description

2) Was follow-up long enough for outcomes to occur

- a) yes (select an adequate follow up period for outcome of interest) ✱
- b) no

3) Adequacy of follow up of cohorts

- a) complete follow up - all subjects accounted for ✱
- b) subjects lost to follow up unlikely to introduce bias - small number lost - > 20\_ % (select an adequate %) follow up, or description provided of those lost) ✱
- c) follow up rate < 80\_% (select an adequate %) and no description of those lost
- d) no statement

**Studies were considered to have**

**Low risk of bias:** 3 - 4 points in selection domain AND 1 -2 points in comparability domain AND 2 - 3 stars in outcome/exposure domain;

**Medium risk of bias:** 2 points in selection domain AND 1 - 2 points in comparability domain AND 2 - 3 stars in outcome/exposure domain;

**High risk of bias:** 0 - 1 point in selection domain OR 0 point in comparability domain OR 0 - 1 point in outcome domain.

**NEWCASTLE - OTTAWA QUALITY ASSESSMENT SCALE**  
**Adapted for CROSS-SECTIONAL STUDIES**

Note: A study can be awarded a maximum of one star for each numbered item within the Selection and Outcome categories. A maximum of two stars can be given for Comparability

**Selection (maximum 5 points)**

1) Representativeness of the exposed cohort

- a) Truly representative of the average in the target population. (all subjects or random sampling)  
✱
- b) Somewhat representative of the average in the target group. \* (non-random sampling)  
✱
- c) Selected group of participants/convenience sample
- d) No description of the sampling strategy or the derivation of included participants

2) Sample size

- a) Justified and satisfactory (including sample size calculation). ✱
- b) Not justified
- c) No information provided

3) Non-respondents:

a) Comparability between respondents and non-respondents characteristics is established, and the response rate is satisfactory. ✱

b) The response rate is unsatisfactory, or the comparability between respondents and non-respondents is unsatisfactory.

c) No information provided on the response rate or the characteristics of the responders and the non-responders

4) Ascertainment of the exposure (risk factor):

a) Validated measurement tool. ✱✱

b) Non-validated measurement tool, but the tool is available or described. ✱

c) No description of the measurement tool

### **Comparability (maximum 2 points):**

1) The subjects in different outcome groups are comparable, based on the study design or analysis. Confounding factors are controlled.

a) The study controls for the most important factor (age and ER/cancer subtype/cancer stage).

✱

b) The study control for any additional factor. ✱

### **Outcome (maximum 3 points)**

1) Assessment of outcome

a) independent blind assessment ✱✱

b) record linkage or Unblinded assessment using objective validated laboratory methods or medical diagnosis ✱✱

c) self report ✱

d) no description

2) Statistical test:

a) The statistical test used to analyse the data is clearly described and appropriate, and the measurement of the association is presented, including confidence intervals and the probability level (p value). ✱

b) The statistical test is not appropriate, not described or incomplete.

### **Studies were considered to have**

**Low risk of bias:** 4 - 5 points in selection domain AND 1 -2 points in comparability domain AND 2 - 3 points in outcome/exposure domain;

**Medium risk of bias:** 2 - 3 points in selection domain AND 1 - 2 points in comparability domain AND 2 - 3 points in outcome/exposure domain;

**High risk of bias:** 0 - 1 point in selection domain OR 0 point in comparability domain OR 0 - 1 point in outcome domain.

**Supplementary Table S4. List of excluded papers (at full-text screening stage)**

| No | Author (Year)           | G CHEN  | Reason for exclusion                                        | JZ NIU  | Reason for exclusion                  | Final decision | Final reason for exclusion                                                 |
|----|-------------------------|---------|-------------------------------------------------------------|---------|---------------------------------------|----------------|----------------------------------------------------------------------------|
| 1  | Augustin et al. (2017)  | exclude | Background article, ineligible intervention:<br>MD+x VS MD  | exclude | MD is not a variable in this study    | exclude        | Wrong intervention (MD in both groups)                                     |
| 2  | Bernstein et al. (2019) | maybe   | abstract                                                    | exclude | abstract                              | exclude        | No full text report                                                        |
| 3  | Biasini et al. (2015)   | maybe   | Abstract, full paper found                                  | exclude | Abstract                              | exclude        | No full text report<br>(Full text found doesn't fully match this abstract) |
| 4  | Biasini et al. (2016)   | maybe   | Abstract, full paper found                                  | exclude | Abstract                              | exclude        | No full text report<br>(Full text found doesn't fully match this abstract) |
| 5  | Bruno et al. (2015)     | exclude | No MD evaluation                                            | exclude | No association of MD was reported     | exclude        | Wrong intervention                                                         |
| 6  | Bruno et al. (2021a)    | exclude | No MD evaluation                                            | exclude | MD is not an independent intervention | exclude        | Wrong intervention                                                         |
| 7  | Bruno et al. (2018)     | exclude | ineligible intervention:<br>MD+PA VS non                    | exclude | Wrong population                      | exclude        | Wrong intervention                                                         |
| 8  | Bruno et al. (2021b)    | exclude | involved both ovarian cancer and BC patients                | exclude | Wrong population                      | exclude        | Wrong population                                                           |
| 9  | Bruno et al. (2020)     | exclude | BC patients were involved in the population, not stratified | exclude | Wrong population                      | exclude        | Wrong population                                                           |



Table S4 continued

| No | Author (Year)            | G CHEN  | Reason for exclusion                                                            | JZ NIU  | Reason for exclusion                                     | Final decision | Final reason for exclusion                                          |
|----|--------------------------|---------|---------------------------------------------------------------------------------|---------|----------------------------------------------------------|----------------|---------------------------------------------------------------------|
| 10 | Calabrese et al. (2019)  | exclude | ineligible intervention: MD+x VS MD, full paper found                           | exclude | abstract                                                 | exclude        | Wrong intervention                                                  |
| 11 | Cioffi et al. (2020)     | maybe   | Ask for full text                                                               | exclude | abstract                                                 | exclude        | No full text report                                                 |
| 12 | Cortesi et al. (2021)    | exclude | MD was presumed, no MD evaluation                                               | exclude | MD is not an intervention in this study                  | exclude        | Wrong intervention                                                  |
| 13 | Farina et al. (2021)     | maybe   | Check full text                                                                 | exclude | Population is not clear                                  | exclude        | No contact information of authors were found<br>No full text report |
| 14 | Flynn and Reinert (2010) | exclude | no MD evaluation                                                                | exclude | MD is not an intervention in this study                  | exclude        | Wrong intervention                                                  |
| 15 | George et al. (2014)     | exclude | BC patients were involved in the population, not stratified                     | exclude | Wrong population                                         | exclude        | Wrong population                                                    |
| 16 | Golubic et al. (2018)    | exclude | No control group<br>BC patients were involved in the population, not stratified | exclude | Wrong population                                         | exclude        | Wrong population                                                    |
| 17 | Huang et al. (2018)      | exclude | No MD evaluation                                                                | exclude | No MD mentioned                                          | exclude        | No MD evaluation                                                    |
| 18 | Koh et al. (2019)        | exclude | No MD evaluation                                                                | exclude | Exposure not related to MD                               | exclude        | No MD evaluation                                                    |
| 19 | Kwon et al. (2020)       | exclude | No control group                                                                | maybe   | Only the data in MD group was reported, outcome is miRNA | exclude        | No control group<br>Wrong study design                              |
| 20 | Lagiou et al. (2006)     | exclude | BC patients is not clear                                                        | exclude | Wrong population                                         | exclude        | Wrong population                                                    |
| 21 | Laudisio et al. (2021)   | maybe   | abstract                                                                        | exclude | Detailed information needed                              | exclude        | No full text report                                                 |

Table S4 continued

| No | Author (Year)                 | G CHEN  | Reason for exclusion                                       | JZ NIU  | Reason for exclusion                  | Final decision | Final reason for exclusion                                           |
|----|-------------------------------|---------|------------------------------------------------------------|---------|---------------------------------------|----------------|----------------------------------------------------------------------|
| 22 | Lopez-Pentecost et al. (2022) | exclude | Wrong population, not BC patient                           | exclude | Wrong population                      | exclude        | Wrong population                                                     |
| 23 | Montagnese et al. (2020)      | exclude | No control                                                 | exclude | No control                            | exclude        | No control group<br>Wrong study design                               |
| 24 | Nct (2019)                    | maybe   | Trial not yet completed?                                   | exclude | Study not complete                    | exclude        | Study not completed<br>(No reply from author)<br>No full text report |
| 25 | Park et al. (2022)            | exclude | Not BC patient                                             | exclude | Wrong population                      | exclude        | Wrong population                                                     |
| 26 | Pierce et al. (2007)          | exclude | No MD evaluation                                           | exclude | MD is not the intervention            | exclude        | Wrong intervention                                                   |
| 27 | Pistelli et al. (2021)        | exclude | No MD evaluation<br>No control group                       | exclude | MD is not an intervention             | exclude        | Wrong study design                                                   |
| 28 | Roldan-Jimenez et al. (2022)  | exclude | No control group<br>Wrong outcome (MD adherence)           | exclude | MD is not an independent intervention | exclude        | No control group<br>Wrong study design                               |
| 29 | Stefani et al. (2019)         | exclude | No PA in control                                           | exclude | MD is not an independent intervention | exclude        | Wrong intervention                                                   |
| 30 | Trestini et al. (2021)        | exclude | No control group                                           | exclude | Before after                          | exclude        | No control group<br>Wrong study design                               |
| 31 | Ubaidullah et al. (2021)      | exclude | Wrong population (no stratified BC data), No MD evaluation | exclude | Wrong population                      | exclude        | Wrong population                                                     |
| 32 | Villarini et al. (2012)       | exclude | No MD evaluation                                           | exclude | MD is not an independent intervention | exclude        | Wrong intervention                                                   |
| 33 | Whalen et al. (2017)          | exclude | Wrong population, not BC patients                          | exclude | Population is not BC patients         | exclude        | Wrong population                                                     |

**Supplementary Table S5.** Characteristics of included studies

| Study                                                           | Country of study | Age                                                | Ethnicity                                                                                                                             | Education                                                                                                                                                              | Smoking                                                                                            | BMI (kg/m2)                                                        | Postmeno-<br>pausal<br>(n (%)) | Breast<br>Cancer<br>Stages                                                     | Breast<br>cancer<br>subtypes                       | Time since<br>breast<br>cancer<br>diagnosis at<br>recruitment | Time since last<br>treatment                                                             | Previous<br>Treatment                                                                                                                                 |
|-----------------------------------------------------------------|------------------|----------------------------------------------------|---------------------------------------------------------------------------------------------------------------------------------------|------------------------------------------------------------------------------------------------------------------------------------------------------------------------|----------------------------------------------------------------------------------------------------|--------------------------------------------------------------------|--------------------------------|--------------------------------------------------------------------------------|----------------------------------------------------|---------------------------------------------------------------|------------------------------------------------------------------------------------------|-------------------------------------------------------------------------------------------------------------------------------------------------------|
| Alvarez-Bustos<br>et al., 2021;<br>Ruiz-Casado et<br>al. (2020) | Spain            | Mean<br>(SD):<br>51(9)                             | NR                                                                                                                                    | Primary or<br>less 13%,<br>secondary<br>35%, College<br>52%                                                                                                            | Smoker 11%                                                                                         | 26 (4.4)                                                           | NR<br>(by<br>AI :25%)          | Stage I<br>35%<br>Stage II<br>49%<br>Stage III<br>16%                          | NR                                                 | Days 856<br>(1950)                                            | Treatment<br>during study<br>data<br>collection:<br>Trastuzumab<br>and HT was<br>allowed | Chemotherapy<br>73%<br>Anthracyclines<br>68%<br>Trastuzumab<br>20%<br>Radiotherapy<br>65%<br>Hormonothera-<br>py 81%<br>(Aromatase<br>inhibitors 25%) |
| Barchitta et<br>al., 2020                                       | Italy            | 36-68                                              | Italian                                                                                                                               | NR                                                                                                                                                                     | NR                                                                                                 | NR                                                                 | NR                             | Stage I-III                                                                    | NR                                                 | NR                                                            | At least 6<br>months prior<br>to the<br>recruitment                                      | Radiotherapy<br>or<br>chemotherapy<br>treatment                                                                                                       |
| Di Maso et al.,<br>2020                                         | Italy            | Median:<br>55<br>(range:<br>23-78)                 | Italian                                                                                                                               | <7 years<br>50.5%, 7-<br>11years<br>28.6%, >12yea<br>rs 20.5%                                                                                                          | Current<br>smoker:<br>19.96%                                                                       | <25 :<br>55.2%,<br>25-29.9:<br>31.9%, ≥30:<br>11.8%                | 900<br>(61.94%)                | Stage I<br>32.69%<br>Stage II<br>44.7%<br>Stage III-IV<br>13.28%               | ER<br>and/or<br>PR+ 20%,<br>ER and<br>PR-<br>41.5% | No longer<br>than 1 year                                      | NR                                                                                       | NR                                                                                                                                                    |
| Ergas et al.,<br>2021                                           | USA              | Mean<br>(SD):<br>59.7<br>(11.9)<br>Range:<br>24-94 | White: 68.1%<br>Black:<br>6.6%<br>Asian/Pacific<br>Islander: 13.0%<br>Hispanic:<br>10.3%<br>American<br>Indian/Alaska<br>Native: 2.1% | High school<br>or less 547<br>(14.9%),<br>Some college<br>1245 (34.0%),<br>College<br>graduate<br>1024 (28.0%),<br>Postgraduate<br>842 (23.0%),<br>Unknown 2<br>(0.1%) | Never 2092<br>(57.2%),<br>Former 1408<br>(38.5%),<br>Current 154<br>(4.2%),<br>Unknown 6<br>(0.2%) | Q1-Q5<br>(by ACS<br>quintile<br>range):<br>29.9(7.3)-<br>26.3(5.2) | 2600<br>(71.0%)                | Stage I<br>54.9%<br>Stage II<br>34.2%<br>Stage III<br>9.5%<br>Stage IV<br>1.5% | ER+<br>83.9%<br>ER-<br>16.0%<br>Unknown<br>0.1%    | Mean: 2.3<br>months<br>(range:<br>0.7-18.7)                   | NR                                                                                       | Surgery 96.7%,<br>Chemotherapy<br>46.7%,<br>Radiotherapy<br>44.4%<br>Hormonothera-<br>py 74.7%                                                        |

Table S5 continued

| Study                                                                      | Country of study  | Age                                                                | Ethnicity                                                                                   | Education                                                                                                                | Smoking                                             | BMI (kg/m2)                                              | Postmeno pausal (n (%)) | Breast Cancer Stages                                                                          | Breast cancer subtypes                     | Time since breast cancer diagnosis at recruitment                   | Time since last treatment                                 | Previous Treatment                                                                           |
|----------------------------------------------------------------------------|-------------------|--------------------------------------------------------------------|---------------------------------------------------------------------------------------------|--------------------------------------------------------------------------------------------------------------------------|-----------------------------------------------------|----------------------------------------------------------|-------------------------|-----------------------------------------------------------------------------------------------|--------------------------------------------|---------------------------------------------------------------------|-----------------------------------------------------------|----------------------------------------------------------------------------------------------|
| Karavasiloglou et al., 2019                                                | Switzerland / USA | Mean: 62.4 (SEM 1.6)                                               | Non-Hispanic white 91.6 %<br>Non-Hispanic black 5.0%<br>Mexican-American 1.5%<br>Other 1.9% | NR                                                                                                                       | Never: 42.5% ,<br>Former: 40.5% ,<br>Current: 16.9% | Mean (SEM): 26.4(0.5)                                    | NR                      | NR                                                                                            | NR                                         | Mean: 8.6 years (SEM 0.7)                                           | NR                                                        | NR                                                                                           |
| Kim et al., 2011                                                           | USA               | 30-55                                                              | NR                                                                                          | NR                                                                                                                       | Current smoker : Q1 vs Q5 22.3%, 7.7%               | aMED Q1 vs Q5: mean 26 vs 25.1                           | CNT                     | aMED Q1 vs Q5<br>Stage I: 57.1% vs 56.8%<br>Stage II: 35% vs 33.9%<br>Stage III: 7.9% vs 9.3% | NR (by TAM: aMEDs Q1 vs Q5 64.1% vs 60.2%) | At least 12 months after breast cancer diagnosis (diet measurement) | NR                                                        | aMED Q1 vs Q5: Chemotherapy 36% vs 36.1%, Radiotherapy 39.5% vs 45% Tamoxifen 64.1% vs 60.2% |
| Long Parma et al., 2022;<br>Zuniga et al. (2019);<br>Ramirez et al. (2017) | USA               | Total Mean: 56.6<br><br>Mean (SD) I: 55.28 (9.85), C: 57.86 (8.81) | Anglo 42.4%, Latino 51.2% Other 6.4%                                                        | High school graduate or less 16 (12.8%)<br>Some college/Assoc degree 41 (32.8%)<br>College graduate or higher 68 (54.4%) | NR                                                  | Overweight or Obese, Mean (SD) I: 31.2(4.1) C: 32.7(5.2) | NR                      | Stage 0: 9.6%,<br>Stage I: 28%,<br>Stage II: 30.4%,<br>Stage III: 16.8%,<br>Don't know: 15.2% | NR, (by HT: ER+ 33.6%)                     | 2 or more months                                                    | < 6 months: 12.8%,<br>6-24 months: 24%,<br>≥24 months 64% | Surgery 93.6%, Chemotherapy 65.6%, Radiotherapy 61.6%, HT 33.6%                              |

Table S5 continued

| Study                                              | Country of study | Age                                               | Ethnicity | Education                              | Smoking                                                         | BMI (kg/m2)                                                               | Postmeno pausal (n (%))    | Breast Cancer Stages                                              | Breast cancer subtypes                   | Time since breast cancer diagnosis at recruitment | Time since last treatment                                                                                                    | Previous Treatment                                                                               |
|----------------------------------------------------|------------------|---------------------------------------------------|-----------|----------------------------------------|-----------------------------------------------------------------|---------------------------------------------------------------------------|----------------------------|-------------------------------------------------------------------|------------------------------------------|---------------------------------------------------|------------------------------------------------------------------------------------------------------------------------------|--------------------------------------------------------------------------------------------------|
| Lorenzo et al., 2020                               | Spain            | Mean (SD): High MD 57.9 (7.3) Low MD: 53.7 (11.4) | Spanish   | NR                                     | NR                                                              | <25:28.9%, ≥ 25:71.1%                                                     | 68.90%                     | Stage I/II 64.4%<br>Stage III/IV 14.4%<br>Unknown 21.1%           | ER+ 76.7%,<br>ER - 13.3%,<br>unknown 10% | newly diagnosed                                   | NR                                                                                                                           | NR                                                                                               |
| Negrati et al., 2021                               | Italy            | Mean (SD) 54.9 (10.6)                             | NR        | NR                                     | NR                                                              | MDS Quartile1 vs Quartile 4: mean 30.8 vs 29.3                            | NR                         | Stage 0 8.8%<br>Stage I 45.2%<br>Stage II 40.2%<br>Stage III 6.3% | NR                                       | NR                                                | at least 2 months                                                                                                            | NR                                                                                               |
| Porciello et al., 2020;<br>Porciello et al. (2019) | Italy            | Mean (SD): 52 (9.2)                               | Italian   | ≤11years 111 (36%), ≥12 years 197(64%) | Never 152 (49.1%),<br>Former 95 (30.7%),<br>Current 58 (18.8 %) | Mean (SD) 27.6 (6.0),<br><25: 41.1%,<br>25.0–29.9: 28.5%,<br>≥30.0: 30.4% | NR                         | Stage I 30.1%<br>Stage II 55.6%<br>Stage III 14.3%                | NR (by HT: ER+ 53.7%)                    | Within 12 months                                  | Treatment during study data collection: Chemotherapy 16.1%, Radiotherapy 7.4% Hormonotherapy 52.4%, Biological therapy 14.9% | Surgery 99.4%, Chemotherapy 46%, Radiotherapy 46.3% Hormonotherapy 1.3%, Biological therapy 0.3% |
| Skouroliahou et al., 2017                          | Greece           | Mean (SD) I: 51.49 (8), C:52.17 (11.52)           | NR        | NR                                     | Current: Intervention 9 (31.4%); Control 5 (14.2%)              | Mean (SD) I: 27.55(4.69) C: 27.73(5.7)                                    | I:16 (45.7%), C: 18(51.4%) | Stage I-III A                                                     | NR, (by HT: ER+ 72%)                     | up to 3 month                                     | NR                                                                                                                           | Chemotherapy 76%, Radiotherapy 66%, HT 68%                                                       |

ACS: American Cancer Society; AI: Aromatase inhibitors; aMEDS: alternative Mediterranean Diet Score; BC: Breast cancer; BMI: Body mass index; C: control group; CNT: Can not tell; ER: estrogen receptor; FFQ: Food Frequency Questionnaire; HER-2: human epidermal growth factor receptor 2; HT: Hormonal therapy; I: intervention group; MD: Mediterranean diet; MDS: Mediterranean Diet Score; NA: Not applicable; NR: Not reported; PR: progesterone receptor; Q: quintile; QoL: quality of life; RCT: Randomised controlled trial; SD: standard deviation; SEM: standard error of the mean; TAM: Tamoxifen;

**Supplementary Table S6. GRADE assessment**

| Certainty assessment        |                       |              |               |              |                      |                      | № of patients     |                   | Effect                 |                                                | Certainty     |
|-----------------------------|-----------------------|--------------|---------------|--------------|----------------------|----------------------|-------------------|-------------------|------------------------|------------------------------------------------|---------------|
| № of studies                | Study design          | Risk of bias | Inconsistency | Indirectness | Imprecision          | Other considerations | High MD adherence | Low MD adherence  | Relative (95% CI)      | Absolute (95% CI)                              |               |
| All-cause mortality         |                       |              |               |              |                      |                      |                   |                   |                        |                                                |               |
| 3                           | observational studies | not serious  | not serious   | not serious  | not serious          | none                 | 272/1447 (18.8%)* | 302/1175 (25.7%)* | HR 0.78 (0.66 to 0.93) | 50 fewer per 1,000 (from 79 fewer to 16 fewer) | ⊕⊕○○ Low      |
| Breast cancer mortality     |                       |              |               |              |                      |                      |                   |                   |                        |                                                |               |
| 2                           | observational studies | not serious  | not serious   | not serious  | serious <sup>a</sup> | none                 | 177/1423 (12.4%)  | 168/1104 (15.2%)  | HR 0.82 (0.65 to 1.03) | 26 fewer per 1,000 (from 50 fewer to 4 more)   | ⊕○○○ Very low |
| Non-breast cancer mortality |                       |              |               |              |                      |                      |                   |                   |                        |                                                |               |

| Certainty assessment |                       |                      |               |              |                      |                      | № of patients     |                  | Effect                        |                                                        | Certainty        |
|----------------------|-----------------------|----------------------|---------------|--------------|----------------------|----------------------|-------------------|------------------|-------------------------------|--------------------------------------------------------|------------------|
| № of studies         | Study design          | Risk of bias         | Inconsistency | Indirectness | Imprecision          | Other considerations | High MD adherence | Low MD adherence | Relative (95% CI)             | Absolute (95% CI)                                      |                  |
| 2                    | observational studies | not serious          | not serious   | not serious  | serious <sup>b</sup> | none                 | 97/1423 (6.8%)    | 137/1104 (12.4%) | <b>HR 0.67</b> (0.50 to 0.90) | <b>39 fewer per 1,000</b> (from 60 fewer to 12 fewer)  | ⊕○○○<br>Very low |
| <b>BMI</b>           |                       |                      |               |              |                      |                      |                   |                  |                               |                                                        |                  |
| 3                    | observational studies | serious <sup>c</sup> | not serious   | not serious  | not serious          | none                 | 208               | 208              | -                             | <b>MD 0.93 kg/m2 lower</b> (2.03 lower to 0.17 higher) | ⊕○○○<br>Very low |

CI: confidence interval; HR: hazard Ratio; MD: mean difference

### Explanations:

a. 95%CI includes a HR of 1.0 and HR under 0.75, which represents wide CI

b. Total number of event does not meet optimal information size criteria

c. Low quality by NOS

\* One study (Karavasiloglou et al., 2019) did not report case number



**Supplementary Table S7. QoL findings in the study of Porciello et al., 2020**

| Study                                               | Country of study | Study design    | Sample size/<br>Number in analysis | Dietary assessment &<br>MD adherence assessment                          | Exposure &<br>Comparator      | Main result<br>(Mean ,SD)                                                                                                                                                                                                                                                                                                                                                                                                                                                                                                                                                                                                                                                                                                                                                                                                                                                                                                                                                                                                                                                                                                                                                                                                                                                                                                                                                                                                                                                                                                                                                                                                                                                                                                                                                                                                                                                                                                    |
|-----------------------------------------------------|------------------|-----------------|------------------------------------|--------------------------------------------------------------------------|-------------------------------|------------------------------------------------------------------------------------------------------------------------------------------------------------------------------------------------------------------------------------------------------------------------------------------------------------------------------------------------------------------------------------------------------------------------------------------------------------------------------------------------------------------------------------------------------------------------------------------------------------------------------------------------------------------------------------------------------------------------------------------------------------------------------------------------------------------------------------------------------------------------------------------------------------------------------------------------------------------------------------------------------------------------------------------------------------------------------------------------------------------------------------------------------------------------------------------------------------------------------------------------------------------------------------------------------------------------------------------------------------------------------------------------------------------------------------------------------------------------------------------------------------------------------------------------------------------------------------------------------------------------------------------------------------------------------------------------------------------------------------------------------------------------------------------------------------------------------------------------------------------------------------------------------------------------------|
| Porciello et al., 2020;<br>(Porciello et al., 2019) | Italy            | Cross-sectional | 309/309                            | 14-item<br>PREDIMED<br>questionnaire<br>(Martínez-González et al., 2012) | PREDIMED>7<br>&<br>PREDIMED≤7 | <p>EQ-5D-3L Score <sup>a</sup>:</p> <p>MDH 0.87 (0.11), MDL 0.84 (0.12), p=0.05</p> <p>β -model1**: 0.167, p=0.004</p> <p>β -model2****: 0.190, p=0.003</p> <p>β -model3*****: 0.169, p=0.063</p> <p>EQRTC QIQ-C30 <sup>b</sup> subscales:</p> <p>Physical functioning:</p> <p>MDH 83.3 (14.5), MDL 78.9 (17.8),p=0.02</p> <p>β -model1*: 0.199, p=0.001</p> <p>β -model2**: 0.207, p=0.001</p> <p>β -model3***: 0.169, p=0.006</p> <p>Role functioning:</p> <p>MDH 80 (22.8), MDL 78.5 (24.3), p=0.56</p> <p>β -model1*: 0.060, p=0.296</p> <p>β -model2**: 0.052, p=0.382</p> <p>β -model3***: 0.037, p=0.534</p> <p>Emotional functioning:</p> <p>MDH 75.3 (251.6), MDL 71.8 (21.2), p=0.15</p> <p>β -model1*: 0.067, p=0.247</p> <p>β -model2**: 0.059, p=0.973</p> <p>β -model3***: 0.033, p=0.587</p> <p>Cognitive functioning:</p> <p>MDH 80.8 (21.5), MDL 81.4 (21.7), p=0.82</p> <p>β -model1*: 0.067, p=0.247</p> <p>β -model2**: 0.059, p=0.973</p> <p>β -model3***: 0.033, p=0.587</p> <p>Constipation:</p> <p>MDH 15 (21.4), MDL 14.3 (23.5), p=0.81</p> <p>β -model1*: -0.013, p=0.827</p> <p>β -model2**: -0.09, p=0.787</p> <p>β -model3***: -0.037, p=0.552</p> <p>Diarrhoea:</p> <p>MDH 7.4 (15.7), MDL 10 (17.4), p=0.16</p> <p>β -model1*: -0.033, p=0.568</p> <p>β -model2**: -0.039, p=0.515</p> <p>β -model3***: -0.021, p=0.717</p> <p>Financial impact:</p> <p>MDH 19 (27.3), MDL 19.1 (27.1), p=0.97</p> <p>β -model1*: -0.036, p=0.540</p> <p>β -model2**: 0.005, p=0.937</p> <p>β -model3***: -0.021, p=0.717</p> <p>Global Health Status/QoL:</p> <p>MDH 62.9 (22.1), MDL 63.2 (20.6), p=0.93</p> <p>β -model1*: 0.010, p=0.856</p> <p>β -model2**: 0.024, p=0.695</p> <p>β -model3***: 0.032, p=0.603</p> <p>Social functioning:</p> <p>MDH 76.9 (25.9), MDL 75.7 (25.7), p=0.67</p> <p>β -model1*: 0.028, p=0.630</p> <p>β -model2**: 0.020, p=0.741</p> <p>β -model3***: 0.0004, p=0.950</p> |

**Table S7 (continued)**

| Study | Country of study | Study design | Sample size/<br>Number in analysis | Dietary assessment &<br>MD adherence assessment | Exposure &<br>Comparator | Main result<br>(Mean ,SD)                                                                                                                                                                                                                                                                                                                                                                                                                                                                                                                                                                                                                                                                                                                                                                                                                                                                                                                                                                                                                                                                                                                                                                                                                                                                                                                                                                                                                                                                                                                                                                                                                                                                                                                                                                                                                                                                                                                                                                                                                                                                                                                                                                                                                                                                                                                                                                   |
|-------|------------------|--------------|------------------------------------|-------------------------------------------------|--------------------------|---------------------------------------------------------------------------------------------------------------------------------------------------------------------------------------------------------------------------------------------------------------------------------------------------------------------------------------------------------------------------------------------------------------------------------------------------------------------------------------------------------------------------------------------------------------------------------------------------------------------------------------------------------------------------------------------------------------------------------------------------------------------------------------------------------------------------------------------------------------------------------------------------------------------------------------------------------------------------------------------------------------------------------------------------------------------------------------------------------------------------------------------------------------------------------------------------------------------------------------------------------------------------------------------------------------------------------------------------------------------------------------------------------------------------------------------------------------------------------------------------------------------------------------------------------------------------------------------------------------------------------------------------------------------------------------------------------------------------------------------------------------------------------------------------------------------------------------------------------------------------------------------------------------------------------------------------------------------------------------------------------------------------------------------------------------------------------------------------------------------------------------------------------------------------------------------------------------------------------------------------------------------------------------------------------------------------------------------------------------------------------------------|
|       |                  |              |                                    |                                                 |                          | <p>Nausea and vomiting:<br/>MDH 7.8 (13.3), MDL 6.9 (14.2), p=0.6<br/> <math>\beta</math> -model1*: 0.019, p=0.742<br/> <math>\beta</math> -model2**: 0.015, p=0.802<br/> <math>\beta</math> -model3***: 0.049, p=0.407</p> <p>Pain:<br/>MDH 23.1 (21.7), MDL 28.5 (24.3), p=0.04<br/> <math>\beta</math> -model1*: -0.175, p=0.002<br/> <math>\beta</math> -model2**: -0.174, p=0.005<br/> <math>\beta</math> -model3***: -0.131, p=0.027</p> <p>Dyspnea:<br/>MDH 18.12 (22.9), MDL 21.6 (23.1), p=0.19<br/> <math>\beta</math> -model1*: -0.115, p=0.045<br/> <math>\beta</math> -model2**: -0.101, p=0.098<br/> <math>\beta</math> -model3***: -0.069, p=0.249</p> <p>Insomina:<br/>MDH 26.7 (28.3), MDL 32.8 (27.6), p=0.06<br/> <math>\beta</math> -model1*: -0.114, p=0.048<br/> <math>\beta</math> -model2**: -0.131, p=0.029<br/> <math>\beta</math> -model3***: -0.096, p=0.101</p> <p>Appetite loss:<br/>MDH 6.4 (17.4), MDL 7.6 (15.1), p=0.52<br/> <math>\beta</math> -model1*: -0.033, p=0.564<br/> <math>\beta</math> -model2**: -0.034, p=0.574<br/> <math>\beta</math> -model3***: -0.131, p=0.027</p> <p>Fatigue:<br/>MDH 32.9 (23.6), MDL 35 (23.5), p=0.42<br/> <math>\beta</math> -model1*: -0.080, p=0.163<br/> <math>\beta</math> -model2**: -0.075, p=0.217<br/> <math>\beta</math> -model3***: -0.062, p=0.300</p> <p>EQRTC QIQ-B23 <sup>b</sup> subscales</p> <p>Body image:<br/>MDH 65.6 (30.6), MDL 60.6 (29.9), p=0.15<br/> <math>\beta</math> -model1*: 0.076, p=0.190<br/> <math>\beta</math> -model2**: 0.065, p=0.294<br/> <math>\beta</math> -model3***: 0.059, p=0.329</p> <p>Sexual functioning:<br/>MDH 80.8 (22.1), MDL 81.5 (22.4), p=0.78<br/> <math>\beta</math> -model1*: -0.037, p=0.526<br/> <math>\beta</math> -model2**: -0.034, p=0.584<br/> <math>\beta</math> -model3***: -0.003, p=0.595</p> <p>Future perspective:<br/>MDH 45.6 (33.6), MDL 42 (34.1), p=0.36<br/> <math>\beta</math> -model1*: -0.058, p=0.325<br/> <math>\beta</math> -model2**: 0.131, p=0.404<br/> <math>\beta</math> -model3***: 0.131, p=0.524</p> <p>Systematic therapy side effects:<br/>MDH 23.9 (18.1), MDL 26.2 (18.9), p=0.29<br/> <math>\beta</math> -model1*: -0.080, p=0.164<br/> <math>\beta</math> -model2**: -0.063, p=0.293<br/> <math>\beta</math> -model3***: -0.038, p=0.531</p> <p>Breast symptoms:<br/>MDH 20.2 (18.1), MDL 24.1 (20), p=0.08</p> |

---

$\beta$  -model1\*: -0.095, p=0.086  
 $\beta$  -model2\*\*: -0.062, p=0.311  
 $\beta$  -model3\*\*\*: -0.054, p=0.362  
 Arm symptoms:  
 MDH 21.1 (19), MDL 21.7 (20.4), p=0.79  
 $\beta$  -model1\*: -0.073, p=0.210  
 $\beta$  -model2\*\*: -0.063, p=0.303  
 $\beta$  -model3\*\*\*: -0.040, p=0.500

- 
- a. EQ-5D-3L (European Quality of Life 5 Dimensions 3 Level): comprises the following five dimensions: mobility, self-care, usual activities, pain/discomfort and anxiety/depression, the digits for the five dimensions can be combined into a 5-digit number and converted to a single summary index, with higher scores indicating higher health utility (0: a health state equivalent to death, negative: worse than death, to 1: perfect health)
- b. EORTC QLQ-C30 (European Organization for Research and Treatment of Cancer Quality of Life Questionnaire Core 30) and EORTC QLQ-BC23 (Breast cancer module): include functional scales (a high score for a functional scale represents a high/ healthy level of functioning), symptom scales and single items (a high score for a symptom scale/ item represents a high level of symptomatology/ problems) and a global health status/ QoL scale (a high score represents a high QoL), range 0-100 for all of the scales/single-item);
- \*Model 1: age, cancer stage;
- \*\*Model 2: age, cancer stage, BMI, type of surgery, comorbidities, combined therapy;
- \*\*\*Model 3: age, cancer stage, smoking status, step count, education, civil status (married or single)

**Supplementary Figure S1. Meta-analysis of MD adherence and all-cause mortality (medium adjusted)**

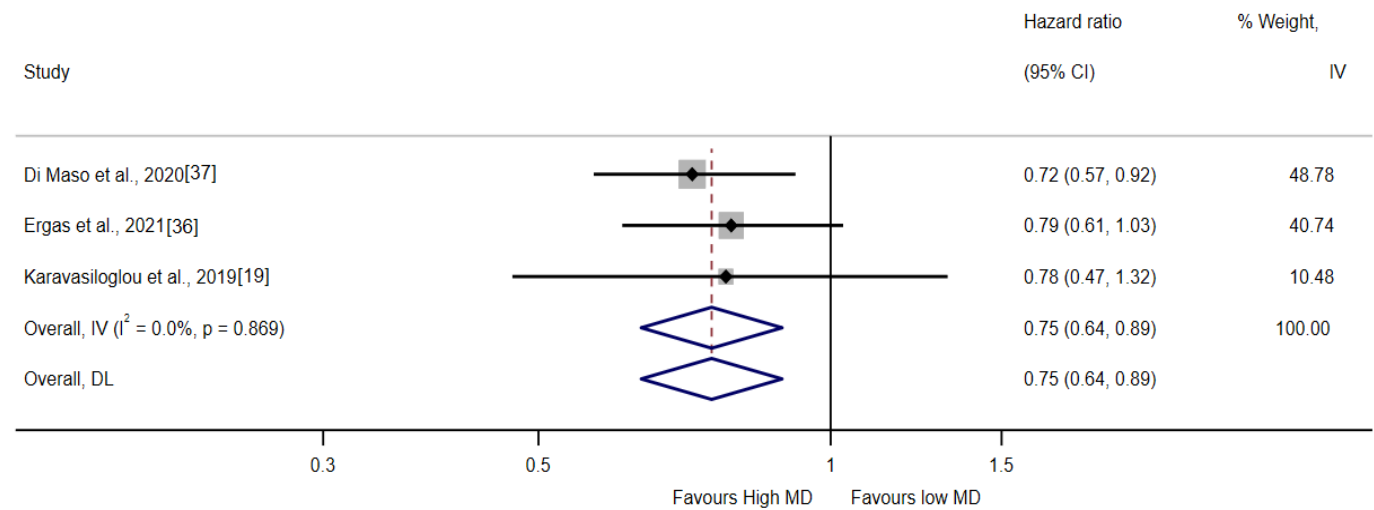

IV: Weights are from fixed-effects model; DL: Weights are from random-effects model  
MD: Mediterranean diet

Supplementary Figure S2. Meta-analysis of MD adherence and BMI (random-effects model)

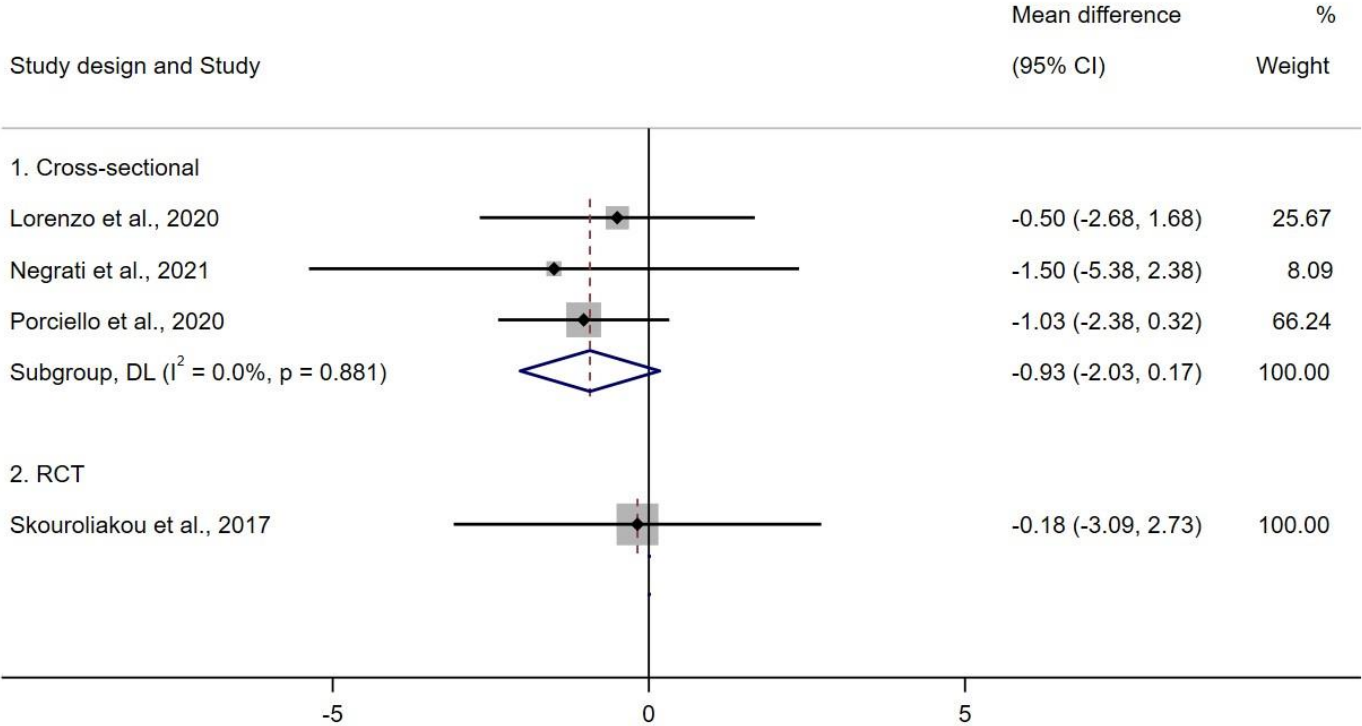

NOTE: Weights and between-subgroup heterogeneity test are from random-effects model
